1 **Profiling the initial burst of beneficial genetic diversity**  
2 **to anticipate evolution of a cell population**

3  
4

5 Daniel E. Deatherage and Jeffrey E. Barrick\*

6

7 Department of Molecular Biosciences, Center for Systems and Synthetic Biology,

8 The University of Texas at Austin, Austin, Texas 78712, U.S.A.

9

10 \* Email: [jbarrick@cm.utexas.edu](mailto:jbarrick@cm.utexas.edu)

11 **Data Availability Statement:** DNA sequence files are available from the NCBI Sequence Read  
12 Archive (accession number PRJNA601748). Code and processed data files are available on  
13 GitHub (<https://github.com/barricklab/adaptome-capture>).

14  
15 **Funding:** This work was supported by the Cancer Prevention & Research Institute of Texas  
16 (CPRIT) (RP130124), the National Institutes of Health (R00-GM087550), the National Science  
17 Foundation (CBET-1554179 and DEB-1813069), and the NSF BEACON Center for the Study of  
18 Evolution in Action (DBI-0939454). D.E.D. acknowledges support from a University of Texas at  
19 Austin CPRIT research traineeship (RP101501). The funders had no role in study design, data  
20 collection and analysis, decision to publish, or preparation of the manuscript.

21  
22 **Competing interests:** J.E.B. is the owner of Evolvomics LLC. D.E.D. has been a paid  
23 consultant for Evolvomics LLC.

24

## 25 **Abstract**

26 Clonal populations of cells continuously evolve new genetic diversity, but it takes a significant  
27 amount of time for the progeny of a single cell with a new beneficial mutation to outstrip both its  
28 ancestor and competitors to fully dominate a population. If genotypes with these driver mutations  
29 can be discovered earlier—while they are still extremely rare—it may be possible to anticipate  
30 the future evolution of these populations. For example, one could diagnose the likely course of  
31 incipient diseases, such as cancer and bacterial infections, and better judge which treatments will  
32 be effective, by tracking rare drug-resistant variants. To test this approach, we replayed the first  
33 500 generations of a >70,000-generation *Escherichia coli* experiment and examined the  
34 trajectories of new mutations in eight genes known to be under positive selection in this  
35 environment in six populations. By employing a deep sequencing procedure using molecular  
36 indexes and target enrichment we were able to track 236 beneficial mutations at frequencies as  
37 low as 0.01% and infer selection coefficients for 180 of these. Distinct molecular signatures of  
38 selection on protein structure and function were evident for the three genes in which beneficial  
39 mutations were most common (*nadR*, *pykF*, and *topA*). We detected mutations hundreds of  
40 generations before they became dominant and tracked beneficial alleles in genes that were not  
41 mutated in the long-term experiment until thousands of generations had passed. Therefore, this  
42 targeted adaptome sequencing approach can function as an early warning system to inform  
43 interventions that aim to prevent undesirable evolution.

## 44 **Introduction**

45 New genetic variation naturally arises in lineages of cells and organisms during genome  
46 replication and repair. These *de novo* mutations are the main drivers of adaptive evolution in  
47 many populations, particularly those with little or no recombination or standing genetic variation.  
48 In large laboratory populations of asexual microbes, numerous lineages with different beneficial  
49 mutations arise and contend within a population before any one outcompetes the ancestor and its  
50 competitors [1–3]. This ‘clonal interference’ leads to heterogeneous populations with many  
51 lineages simultaneously adapting via distinct sets of mutations, though often these mutations are  
52 in a small subset of genes that are under the strongest selection [4–6].

53 In human cancers and chronic microbial infections, single cells clonally expand in a similar  
54 fashion by evolving driver mutations that lead to disease progression and drug resistance. Both  
55 solid tumors and blood cancers have been shown to be genetically heterogeneous [7–9]. *De novo*  
56 mutations within these cell populations are responsible for neoplastic progression [10],  
57 differences in responses to chemotherapy [11], and relapse [12]. Populations of *Pseudomonas*  
58 *aeruginosa* and other bacteria that persistently infect the lungs of cystic fibrosis patients become  
59 increasingly invasive and antibiotic resistant over time [13–15]. In these cases, there are also  
60 specific genetic loci that are repeatedly mutated in different individuals. Better predicting the  
61 future evolution of each of these types of cell populations and others would inform treatment  
62 decisions and improve medical outcomes.

63 Cells used in biomanufacturing are also prone to evolving unwanted genetic heterogeneity  
64 [16,17]. Typically, these cells have been heavily engineered to optimize the titer of a product of  
65 interest at the expense of rapid cellular replication [18,19]. Therefore, there are strong selective  
66 pressures for ‘escape mutations’ that cause production to decline. Usually escape mutations

67 directly inactivate one or more key genes in the engineered pathway. The resulting nonproducing  
68 cells can become dominant during the many cell divisions that are necessary to scale these  
69 processes up to large bioreactors [20–22]. The ability to predict the future evolution of  
70 nonproducing cells before attempting scale-up could guide strain design decisions and thereby  
71 improve the efficiency of industrial processes.

72 Evolution experiments conducted in controlled laboratory environments reproduce key  
73 aspects of microbial evolution that are observed in chronic infections and bioreactors [23,24]. In  
74 theory, profiling rare mutations in the earliest stages of clonal interference using high-throughput  
75 DNA sequencing should allow one to anticipate the future evolution of these populations.  
76 However, these studies have generally been limited by sequencing depth and per-base error rates  
77 to reliably identifying mutations that are present in at least one sample at a frequency above ~1-  
78 10% when they have already succeeded in becoming dominant [1,3,25,26]. Theory and  
79 simulations predict that many more highly beneficial mutations evolve in these populations but  
80 never reach such high frequencies before they are driven extinct [4,6], and recent studies that  
81 track the evolution of barcoded lineages of microbes show that this is the case [27,28].

82 Here, we used methods for selectively increasing sequencing depth and lowering sequencing  
83 error rates to deeply profile the initial burst of rare beneficial mutations in laboratory populations  
84 of *E. coli*. We directly identified diverse beneficial mutations in six genes when they were orders  
85 of magnitude lower in frequency and hundreds of generations earlier than could be accomplished  
86 by standard metagenomic sequencing methods. By comparing our results to the long history of a  
87 >70,000-generation *E. coli* evolution experiment that used the same ancestral strains and nearly  
88 identical culture conditions [29], we evaluate the potential of this type of targeted adaptome  
89 analysis for anticipating the future evolution of cell populations.

90

## 91 Results

### 92 Replaying the beginning of a long-term evolution experiment

93 We tracked new mutations in nine replicate *E. coli* populations that were propagated via daily  
94 serial transfers in glucose-limited minimal medium for 500 generations. Our experiment used the  
95 same *E. coli* strains as the Lenski long-term evolution experiment (LTEE) and similar growth  
96 conditions (see **Methods**). Each population was inoculated with a 50/50 mixture of the two  
97 neutrally marked LTEE ancestor strains to visualize the initial selective sweep [30]. Most  
98 populations maintained a roughly equal representation of descendants of both ancestral strains  
99 through the first 300 generations (**Fig. 1**). These dynamics are in agreement with what has  
100 previously been observed in studies of the LTEE, where few mutations reach a high frequency in  
101 the first few hundred generations of evolution [3].

102

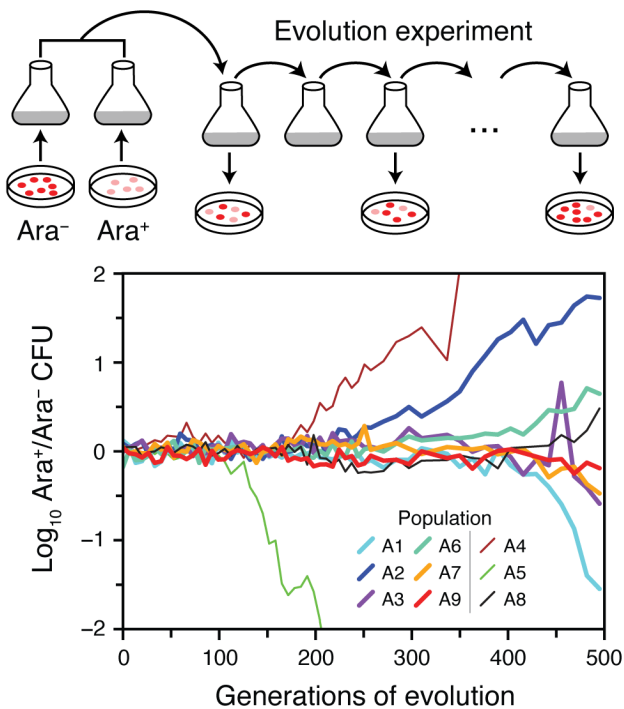

103

104 **Figure 1. Replaying the first selective sweep of a long-term evolution experiment.** Nine *E.*  
105 *coli* populations were initiated from equal mixtures of two variants of the ancestral strain that  
106 differ in a neutral genetic marker for arabinose utilization (Ara). We observed the evolutionary  
107 dynamics of these populations over ~500 generations of regrowth from 75 daily 1:100 serial  
108 transfers by periodically plating dilutions of each population on indicator agar. The ratio of Ara<sup>+</sup>  
109 cells (pink colonies) to Ara<sup>-</sup> cells (red colonies) diverges from 1:1 when descendants of one  
110 ancestor type accumulate enough of a fitness advantage due to *de novo* beneficial mutations that  
111 they take over. We focused further analysis on six of the nine populations (thick lines).  
112

### 113 **Reconstructing the trajectories of new beneficial mutations**

114 We next performed deep sequencing of eight genes at ~25 generation increments over all 500  
115 generations of the evolution experiment for four of the nine populations. These eight genes  
116 (*nadR*, *pykF*, *topA*, *spoT*, *fabR*, *ybaL*, *hslU*, and *iclR*) are known to be targets of selection in the  
117 LTEE [3,31]. Illumina libraries containing molecular indexes [32] were prepared for sequencing  
118 and enriched for the regions of interest using solution based hybridization [33]. Consensus  
119 sequence reads were generated based on groups of reads with identical molecular indexes and  
120 aligned to the *E. coli* genome to predict mutations, including using split-read mapping to identify  
121 transposon insertions and large deletions (**Fig. 2A**). The enrichment procedure was effective. In  
122 the sample with the median number of total consensus reads, the average coverage depth across  
123 each of the eight genes of interest exceeded 5,000 (**Fig. 2B**). After analyzing patterns in mutation  
124 frequencies over time to eliminate other systematic biases (see Methods), we were able to track  
125 the evolution and competition of 180 *de novo* mutations, including when many were present in  
126 less than 0.1% of the cells in a population (**Fig. 2C**, **Fig. 3**).

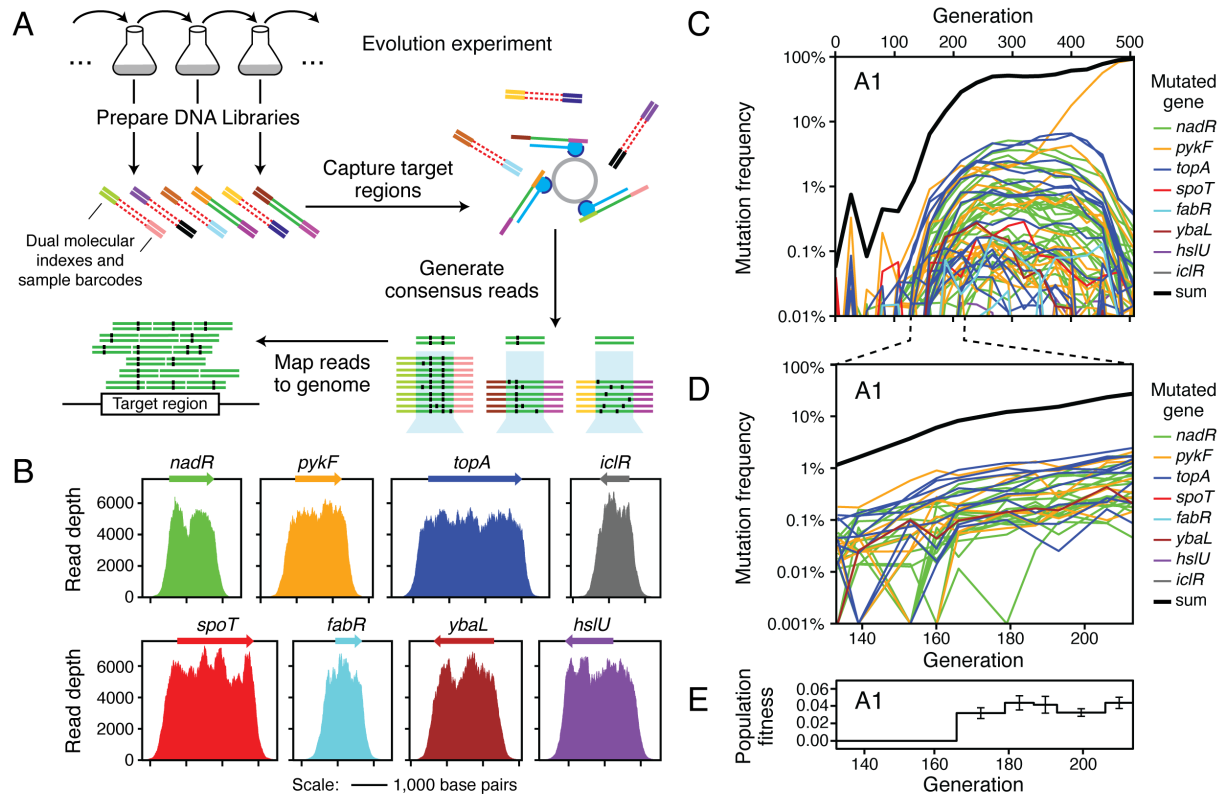

127  
 128 **Figure 2. Profiling many beneficial mutations in the first selective sweep by deep**  
 129 **sequencing.** (A) Schematic of the deep sequencing approach. Genomic DNA is directly isolated  
 130 from the *E. coli* populations and prepared for Illumina sequencing with unique molecular indexes  
 131 (colored ends attached to red/green double stranded DNA). DNA fragments matching the  
 132 targeted genome regions (green centers) are captured by probes (blue) bound to magnetic beads  
 133 and other sequences are washed away (red centers). Reads with the same unique molecular  
 134 index, which were amplified from the same original genomic DNA fragment, are used to  
 135 construct a consensus read to eliminate sequencing errors. Consensus reads are mapped to the  
 136 reference genome to call sequence variants. (B) Enrichment of reads mapping to eight genes  
 137 known to be early targets of selection in this environment from the long-term evolution  
 138 experiment. The final coverage depth of consensus reads in and around these genes is shown for  
 139 a typical sample (population A7 at 500 generations). (C) Frequency trajectories for mutations in  
 140 the eight targeted genes as well as the sum total frequency in population A1 over the complete  
 141 time course of the evolution experiment. When a mutation was not detected at a time point, its  
 142 trajectory is shown as passing through a frequency of 0.0001% (outside of the graphed region).  
 143 (D) Mutation frequency trajectories for population A1 during the window from 133 to 213  
 144 generations when mutations were first reaching detectable frequencies as they outcompeted the  
 145 ancestral genotype. At time points when a mutation was not detected, its frequency is shown as  
 146 0.001% (at the bottom of the plot). (E) Estimate of average population fitness between the time  
 147 points in the window when mutations were first detected. The frequency trajectories of the  
 148 beneficial mutations in the initial sweep shown in D were used to jointly estimate population  
 149 fitness and the individual selection coefficients of each mutation. Error bars are 95% confidence  
 150 intervals on fitness estimations.



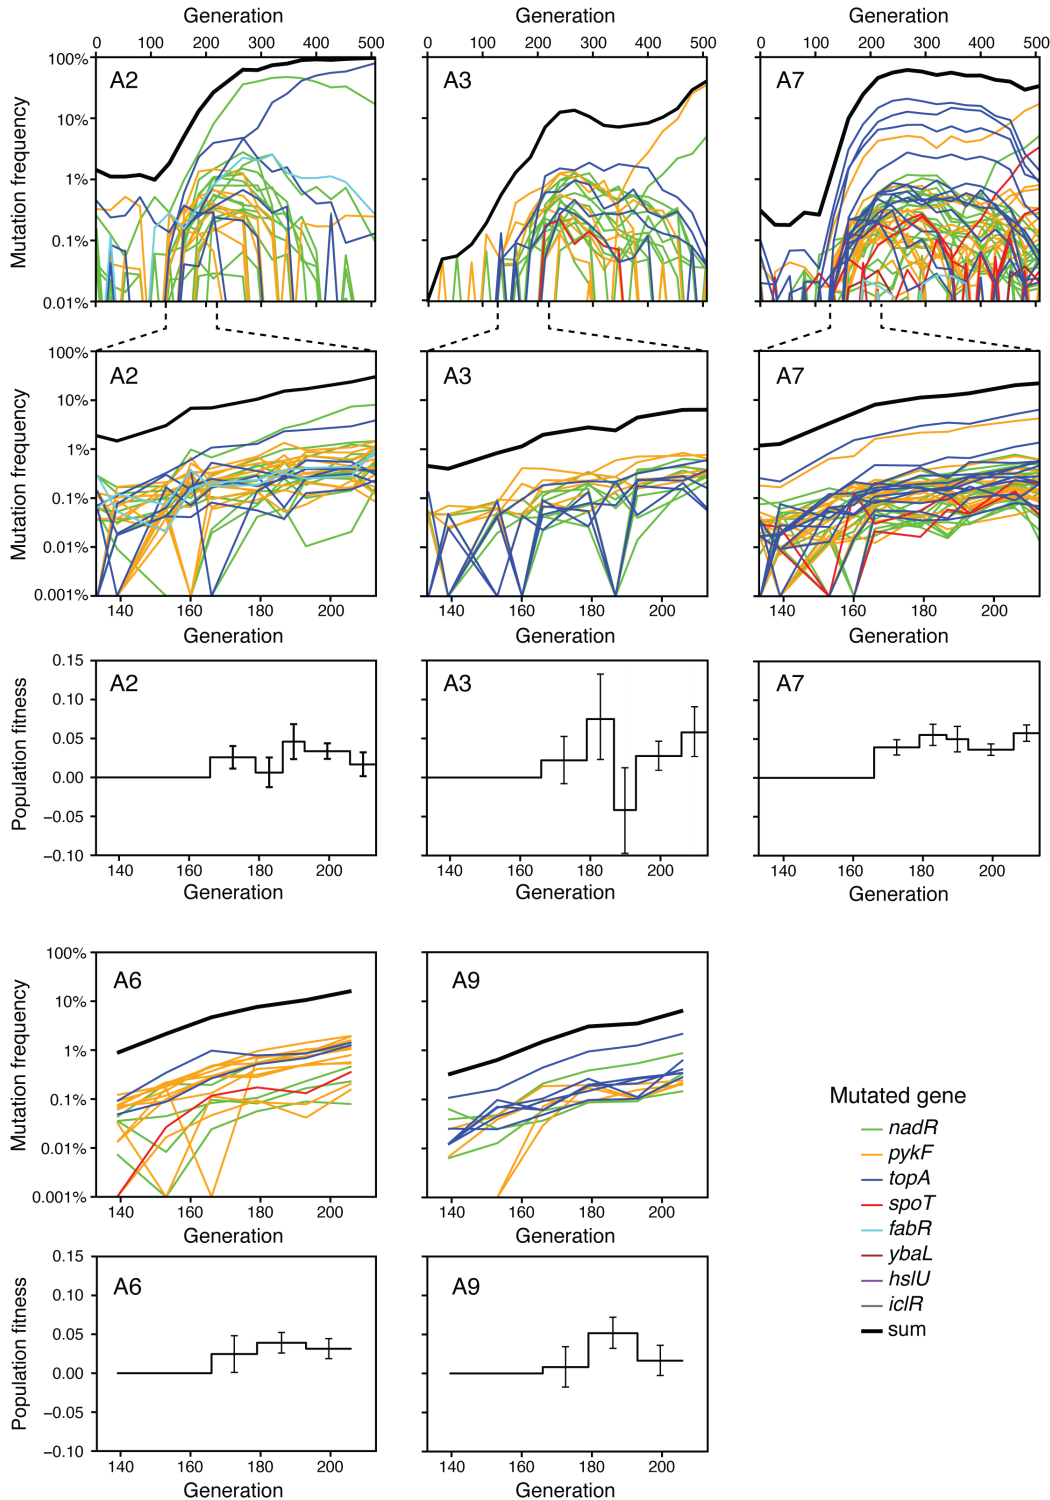

151  
152 **Figure 3. Frequency trajectories of mutations in the remaining populations.** The same plots  
153 described in Figure 2C-E for population A1 are shown for populations A2, A3, and A7 (top three  
154 sets of panels). For populations A6 and A9, sequencing was only performed at time points during  
155 the selective sweep window so only the plots corresponding to Figure 2D-E are shown (bottom  
156 two sets of panels).

157 Mutation trajectories in all four populations exhibited a burst of genetic diversity in the  
158 targeted genes followed by loss of this diversity. The initial dynamics are expected to be largely  
159 driven by new genotypes that each evolve a single beneficial mutation very early in the  
160 experiment. If their descendants escape stochastic loss, they will gradually increase in frequency  
161 over the first few hundred generations as they outcompete the ancestral genotype. Once the  
162 population becomes dominated by these first-step mutants, their frequency trajectories plateau  
163 because of clonal interference: they are now mainly competing against one another and are  
164 relatively evenly matched. In populations A1, A2, and A7, the total frequencies of the mutations  
165 we identified sums to 50-62% at generation 270, indicating that each population is mostly  
166 composed of genotypes with a single mutation in one of the focal genes. We recovered less of  
167 the initial beneficial mutation diversity in population A3 where this sum was only 13%.

168 After around 300 generations, there is a steady decline in the frequencies of most mutations  
169 in the eight targeted genes. At this point, new more-fit genotypes that have evolved from the  
170 single-step mutants begin to exert their influence and displace them. Many of the most successful  
171 second-step genotypes are descended from cells that already have a mutation in one of the  
172 targeted genes. The original mutations serve as markers for the further expansion of these  
173 subpopulations after a period during which their frequencies stagnate or decrease, but the new  
174 beneficial mutations responsible for this further increase in fitness are outside of the genomic  
175 regions we surveilled. The converse situation, in which a beneficial mutation in one of the eight  
176 focal genes appears in a cell with an untracked beneficial mutation elsewhere in the genome, also  
177 occurs in a few cases. Most strikingly, a new mutation in *pykF* that only appears after 300  
178 generations in population A3 rapidly increases in frequency and becomes dominant, strongly  
179 suggesting that it appeared in a genetic background with a prior, unknown beneficial mutation.

180

181 **Selection coefficients can be inferred from initial mutation trajectories**

182 We next sought to calculate the fitness benefits of individual mutations by tracking how rapidly  
183 their frequencies rose early in the experiment when they were largely competing versus the  
184 ancestral genotype because all new mutations in the population were still rare. To that end, we  
185 performed additional sequencing on six populations (including the four already sequenced at 25  
186 generation increments) at ~13-generation increments in a time window from 133 to 213  
187 generations (**Fig. 2D, Fig. 3**). We were able to track a total of 161 mutations during this time,  
188 including 56 that were not identified in the complete time courses. More than 95% of these  
189 mutations occurred in just three of the targeted genes: *nadR*, *pykF*, and *topA* (**Fig. 4A**).

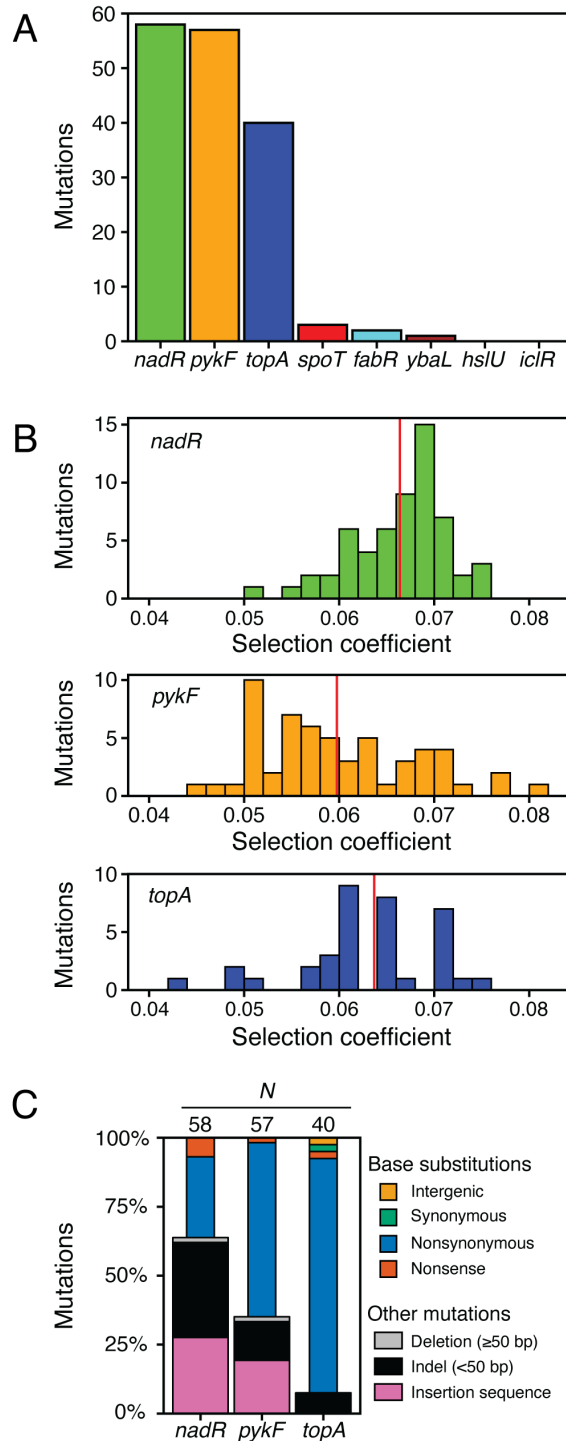

190  
191  
192  
193  
194  
195  
196  
197

**Figure 4. Characteristics of beneficial mutations in the initial selective sweep.** (A) Total number of beneficial mutations in each targeted gene identified in the window time courses from 133 and 213 generations for all six *E. coli* populations that were profiled. (B) Distribution of selection coefficients of beneficial mutations determined from the window time courses in the three genes that were the dominant targets of selection. Vertical red lines show the mean of each distribution. (C) Spectrum of beneficial mutation types in the three genes that were the dominant targets of selection in the window time courses.

198 We were able to estimate a selection coefficient for each of the 161 mutations predicted in  
199 the window time courses by fitting a binomial logistic model to the counts of reads supporting  
200 the variant versus reference sequences over time. In all populations, there is a slight deceleration  
201 in the rate at which the frequencies of the new mutations increase at generation 166 and later that  
202 coincides with the onset of clonal interference (**Fig. 2E, Fig. 3**). At this point, genotypes with  
203 beneficial mutations begin to make up an appreciable fraction of the population and compete  
204 against one another rather than effectively only versus their ancestor. After correcting for this  
205 increase in overall population fitness (see Methods), the mean selection coefficient that we  
206 inferred for the tracked mutations in all six populations was 6.32% with a standard deviation of  
207 0.74%. Although the distributions of selection coefficients estimated for mutations in *nadR*,  
208 *pykF*, and *topA* overlap (**Fig. 4B**), there was a significant stratification among these genes.  
209 Mutations in *nadR* were 0.27% more beneficial than mutations in *topA*, on average, and this  
210 difference was significant ( $p = 0.024$ , Kolmogorov-Smirnov test). In turn, mutations in *topA*  
211 were 0.39% more beneficial than those in *pykF* ( $p = 0.00035$ , Kolmogorov-Smirnov test). The  
212 six mutations in other genes (*spoT*, *yijC*, and *ybaL*) for which we were able to estimate selection  
213 coefficients were roughly as beneficial as mutations in *nadR*, *pykF*, and *topA*.

214

### 215 **Beneficial mutations reveal different signatures of selection on gene function**

216 Of the 236 mutations that we were able to track in complete or window time courses, 218 were  
217 in the *nadR*, *pykF*, or *topA* genes. The large sets of beneficial mutations in these genes gave us  
218 the statistical power to test for several signatures of molecular evolution to predict what types of  
219 changes in the function of each gene improved *E. coli* fitness in this environment. Each of the  
220 three genes exhibited a distinct spectrum of beneficial mutations (**Fig. 4C**). In some cases,

221 different types of mutations were also unevenly distributed throughout the sequences of these  
 222 three commonly hit genes and had noticeably different effects on bacterial fitness (**Fig. 5A**).

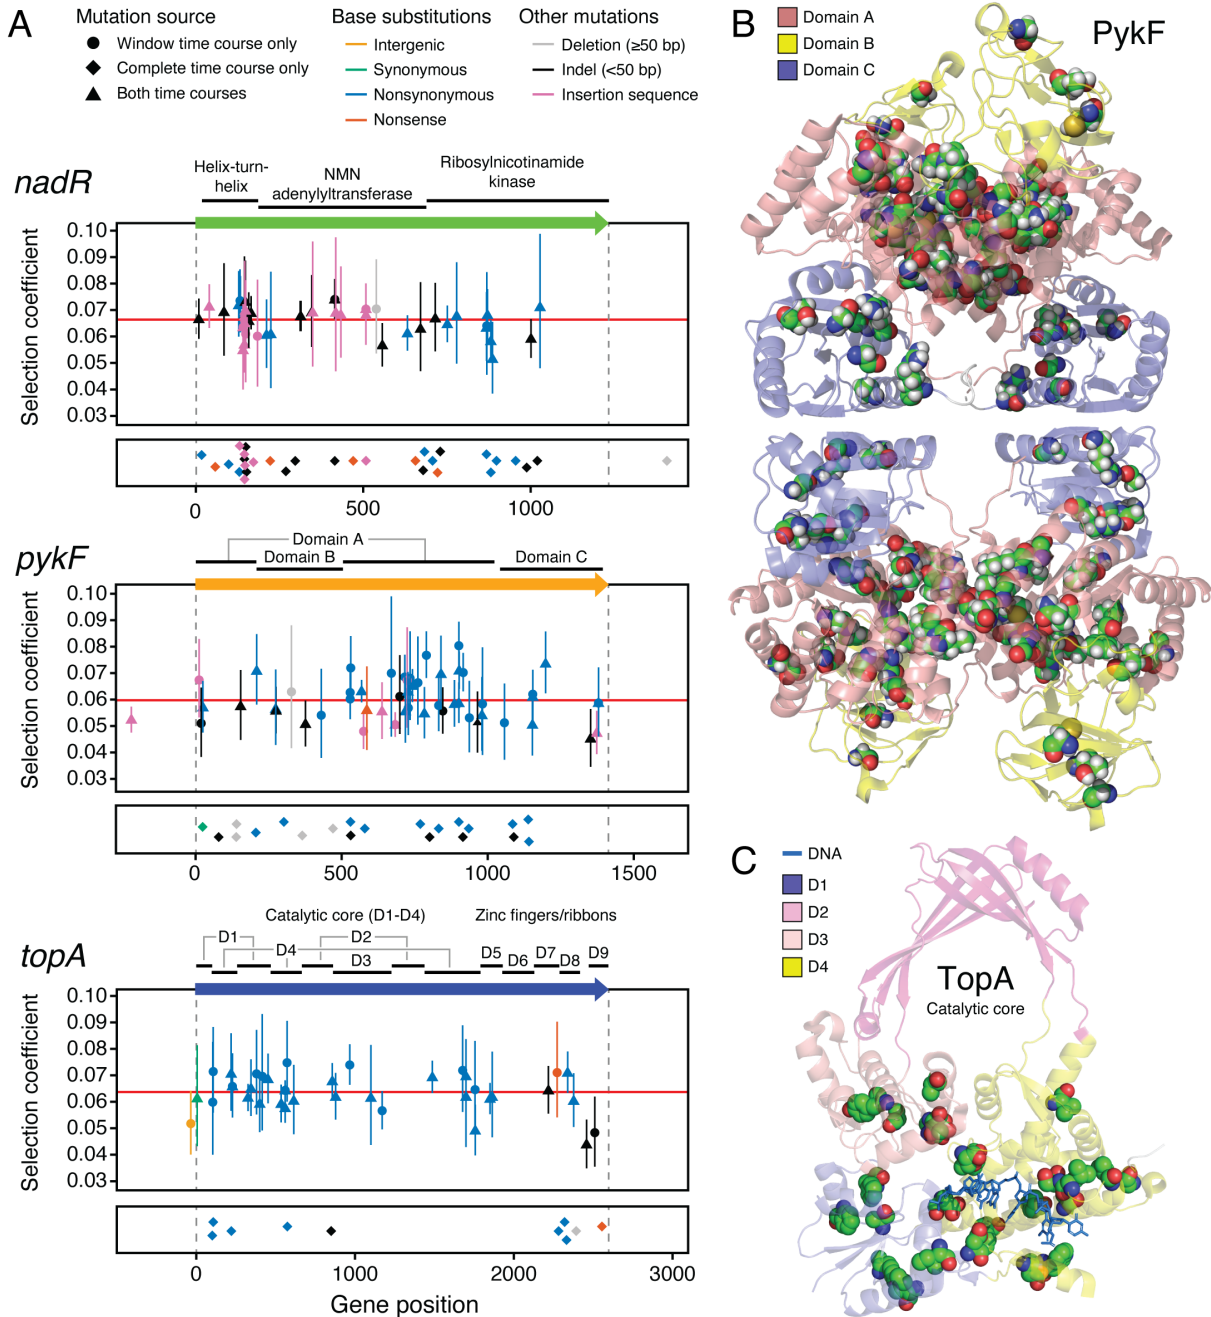

223  
 224 **Figure 5. Mutations in the three genes that were the dominant targets of selection.** (A)  
 225 Locations and properties of all mutations found in each of the three genes that were the dominant  
 226 targets of selection during the evolution experiment. Colors represent the type of mutation.  
 227 Symbols indicate whether each mutation was detected in the window time course, the complete  
 228 time course, or both. The reading frame of each gene is shown above each panel with protein  
 229 domains labeled. Vertical dashed grey lines represent the start and end of each gene. Error bars

230 are 95% confidence limits on selection coefficients determined for the mutations detected in the  
231 window time courses. Horizontal red lines represent the average selection coefficient for all  
232 mutations in a gene. Mutations that were only detected in the complete time course are shown in  
233 the band below each graph because they do not have estimated selection coefficients. (B)  
234 Structural context of mutations in PykF. Sites of nonsynonymous mutations are highlighted by  
235 showing space-filling models of the substituted amino acid residues. All four subunits of the  
236 PykF homotetramer are shown. (C) Structural context of mutations in the catalytic core of TopA.  
237 Sites of nonsynonymous mutations are highlighted by showing space-filling models of the  
238 substituted amino acid residues. Only domains D1-D4 are present in the structure. The DNA  
239 strand interacting with TopA is shown as a stick model.

240 The *E. coli nadR* gene has three distinct functions related to NAD biosynthesis: (1) the N-  
241 terminal domain is a helix-turn-helix that binds to DNA so that it can act as a negative  
242 transcriptional regulator of NAD salvage and transport pathways; (2) the internal domain is an  
243 NMN adenylyltransferase [34]; and (3) the C-terminal domain is predicted to have  
244 ribosylnicotinamide kinase activity [35]. Large deletions, frameshifts from small insertions or  
245 deletions (indels), insertions of transposable insertion sequence (IS) elements, and base  
246 substitutions creating stop codons dominate the *nadR* mutational spectrum (**Fig. 4C**). These  
247 disruptive mutations, which are expected to result in complete loss of gene function, are  
248 significantly overrepresented versus nonsynonymous base substitutions in the first two domains  
249 of the gene compared to the remainder (11.4 odds ratio,  $p = 4.2 \times 10^{-6}$ , one-tailed Fisher's exact  
250 test) (**Fig. 5A**). Yet, there is no evidence of a greater selection coefficient for disruptive  
251 mutations compared to nonsynonymous mutations overall ( $p = 0.19$ , one-tailed Kolmogorov-  
252 Smirnov test). These results suggest that complete inactivation of *nadR* yields the maximum  
253 benefit possible for a mutation in this gene, through disrupting all three of its distinct functions  
254 may not be necessary for achieving this full benefit. Consistent with this prediction, deletion of  
255 *nadR* is highly beneficial in the LTEE environment [36].

256 Pyruvate kinase 1 (*pykF*) catalyzes the final step of glycolysis, transferring a phosphate group  
257 from phosphoenolpyruvate (PEP) to ADP to generate pyruvate and ATP. It is a key enzyme in



258 regulating glycolytic flux [37,38]. We observed an intermediate representation of disruptive  
259 mutations in *pykF*, fewer than in *nadR* but more than in *topA* (**Fig. 4C**). Interestingly,  
260 nonsynonymous base substitutions in *pykF* tend to have a larger selection coefficient than  
261 disruptive mutations ( $p = 0.00390$ , Kolmogorov-Smirnov test) (**Fig. 5A**). This finding is in  
262 agreement with a recent study of various *pykF* alleles that arose in the LTEE which found that  
263 nearly all *pykF* point mutations were more beneficial than deletion of the *pykF* gene, both in the  
264 ancestor and in evolved genetic backgrounds [39]. PykF forms a homotetramer in which each  
265 polypeptide is folds into three structural domains [40,41]. The central domain C forms the active  
266 site at the interface with domain B and the binding site for the allosteric effector fructose 1,6-  
267 bisphosphate at the interface with domain A. The nonsynonymous mutations that we observed  
268 are more concentrated than expected in domain C versus the other structural domains ( $p =$   
269  $0.0050$ , one-tailed binomial test) (**Fig. 5B**). Overall, these results suggest that complete  
270 inactivation of *pykF* is highly beneficial in the environment of our evolution experiment, but  
271 mutations that alter its activity—likely in ways that reduce glycolytic flux—are even more so. It  
272 has been suggested that reducing *pykF* activity is beneficial in the similar glucose-limited  
273 conditions of the LTEE because this allows more PEP to be used for import of glucose into cells  
274 by the phosphotransfer system [42].

275 DNA topoisomerase I (*topA*) relaxes negative supercoiling introduced into the chromosome  
276 by replication and transcription [43]. The mutations we observed in *topA* are almost exclusively  
277 single-base substitutions (**Fig. 4C**), suggesting that modulating the activity of this enzyme  
278 provides a fitness benefit. Indeed, complete loss of *topA* function is lethal to *E. coli* without  
279 compensatory mutations in DNA gyrase [44,45]. The structure of *E. coli* TopA consists of four  
280 N-terminal domains (D1-D4) that make up the catalytic core and five C-terminal zinc finger and



281 ribbon domains (D5-D9) [46]. The few out-of-frame indels and the large deletion that we  
282 observe truncate TopA within domains D7-D9, which interact with single-stranded DNA and  
283 RNA polymerase but are not critical for catalysis. Considering only the catalytic core, we find  
284 that nonsynonymous mutations are concentrated in domains D1 and D4 versus D2 and D3 ( $p =$   
285 0.0060, one-tailed binomial test) (**Fig. 5C**). D1 and D4 together form the ssDNA binding groove  
286 leading to the active site, and D1 also forms part of the active site at its interface with D3 [47].  
287 Several base substitutions in *topA* have been shown to increase positive supercoiling in evolved  
288 LTEE strains [48,49]. The exact reason that this change in supercoiling is beneficial is unknown,  
289 but it may be linked to increasing the expression of ribosomal RNAs [48], altering gene  
290 regulation responses to starvation or stress [49], and/or increasing gene expression divergently  
291 transcribed operons [50].

292

## 293 **Discussion**

294 We examined bacterial evolution during the initial stages of clonal competition when there is a  
295 burst of beneficial genetic diversity as many new subpopulations with different mutations evolve  
296 and begin to displace the ancestral genotype. We focused on eight genes known to accumulate  
297 adaptive mutations in the >70,000 generation Lenski long-term evolution experiment (LTEE)  
298 with *E. coli* that used nearly the same environment as our experiments. The only difference was  
299 that we added four times as much of the limiting nutrient (glucose). By combining Illumina  
300 sequencing of reads that incorporate molecular indexes for error correction, hybridization-based  
301 capture of DNA encoding these genes, and dense temporal sampling, we were able to identify  
302 more beneficial mutations and track them at much lower frequencies than is possible with  
303 standard metagenomic sequencing. We detected a total of 236 mutations in the focal genes: 180

304 in the complete time courses of four populations and 161 in the window time courses of these  
305 populations and two others, with 105 mutations overlapping between the two sets.

306 By densely sampling and deeply sequencing *E. coli* populations, we were able to characterize  
307 many beneficial mutations that never reach the detection limits of standard Illumina sequencing  
308 before they become casualties of clonal interference. Only 13 of the 180 mutations we detected  
309 in the complete time courses ever achieved a frequency of 5% or more, which can be reliably  
310 distinguished from noise by standard metagenomic sequencing, and only seven were this  
311 common for 100 or more generations, such that they were likely to be detected by a typical time-  
312 sampling scheme. Considering both the complete and window time courses we characterized 177  
313 and 27 mutations that never reached 1% or 0.1% thresholds, respectively, at any of our sampled  
314 time points. Our success in recovering rare variants meant that we discovered more examples of  
315 beneficial mutations in the three commonly mutated genes (*topA*, *pykF*, and *nadR*) than have  
316 been reported in many prior studies of the evolution of the twelve LTEE populations  
317 [3,31,36,42,51,52]. These large sets of mutations enabled us to identify distinct molecular  
318 signatures of adaptation in each protein.

319 We profiled evolution driven by mutations in eight genes known to be targets of selection in  
320 the LTEE. Mutations in four of these (*topA*, *pykF*, *spoT*, and *fabR*) reach high frequencies within  
321 the first 1,000 generations of the LTEE in multiple populations [3,52]. Mutations in the other  
322 four (*hslU*, *nadR*, *ybaL*, and *iclR*) are also common in the LTEE, but they typically occur later  
323 (often within the first 2,000 to 10,000 generations) [3,31]. Nearly all mutations in these genes in  
324 our evolution experiment were in *topA*, *pykF*, and *nadR*, but we also found multiple mutations  
325 that were similarly beneficial in *spoT*, *fabR*, and *ybaL*. Mutations in *nadR* were more widespread  
326 than expected in our experiment and may be more likely to completely disrupt its function than

327 beneficial alleles that evolve in the LTEE [51]. Mutations in *spoT* and *fabR* were rarer than  
328 expected from the LTEE. One possible explanation for these slight differences is the increased  
329 concentration of glucose in our experiment compared to the LTEE. These minor deviations are  
330 also reminiscent of how changing a different aspect of the environment (temperature) re-focuses  
331 the mutations of largest benefit that succeed early onto different subsets of genes, nearly all of  
332 which eventually accumulate beneficial mutations later in the LTEE environment, in related  
333 evolution experiments [53,54]. Despite these subtle differences, we were still able to account for  
334 majority of the genetic variation present in three of four of the four populations that we profiled  
335 over the entire 500 generations by analyzing evolution in the eight candidate genes.

336 We also wanted to understand to what extent we gained early warning of driver mutations by  
337 deeply profiling evolution in genes we expected to be under strong selection. In general, we were  
338 able to begin tracking most mutations when they were above a frequency of 0.01%. This level of  
339 profiling enabled us to first detect mutations an average of 75, 152, and 290 generations before  
340 they surpassed frequencies of 0.1%, 1%, and 5%, respectively. Under the conditions of our  
341 experiment these intervals take roughly 11, 23, and 44 days, respectively; so, even though we  
342 made these predictions retrospectively, there would have been sufficient time to complete the  
343 DNA isolation, library preparation, sequencing, and analysis steps quickly enough for this  
344 approach to give early warning of specific genetic variants driving evolution of these  
345 populations. The amount of lead time becomes disproportionately longer at higher frequencies  
346 due to clonal interference between beneficial mutations. The chances and timescales of earlier  
347 detection are expected to increase even more when there are ecological interactions or spatial  
348 structure that further slow the takeover of new variants, as has been demonstrated and discussed  
349 in other microbial evolution experiments [26,55,56].

350 A further prediction is that the genes in which we observe early, but unsuccessful beneficial  
351 mutations will sustain mutations again and again until they are successful in a population's  
352 evolutionary future. This prediction is limited by the nature of epistatic interactions. In the LTEE  
353 and other microbial evolution experiments, diminishing returns epistasis dominates between  
354 beneficial mutations in different genes [57–61]. That is, mutations in one gene that improve the  
355 fitness of the ancestor tend to still be beneficial to evolved genotypes containing beneficial  
356 mutations in other genes, just less so than when those other mutations are not present.  
357 Subpopulations with mutations in both *nadR* and *pykF* evolve by 20,000 generations in all 12  
358 LTEE populations, and cells that also contain a mutation in *topA* are found in six of the LTEE  
359 populations at this point [31]. By this time, mutations in *ybaL* and *spoT* are also found in nine  
360 and six LTEE populations, respectively. So, for five of the six genes in which we detected  
361 multiple mutations in the initial burst phase, it is likely that nearly all of them would have  
362 eventually accumulated beneficial mutations if we continued our experiment.

363 The genes in which we did not detect multiple mutations (*fabR*, *iclR*, and *hslU*) likely  
364 represent other scenarios. Mutations in *fabR* transiently appear within the first 2,000 generations  
365 of the LTEE [52]. They interact unfavorably with beneficial mutations in *spoT* and other genes,  
366 such that a *fabR* mutation essentially precludes further adaptation by mutating the other set of  
367 genes and vice-versa [52,62]. So, *fabR* mutations are unlikely to re-emerge in the future of these  
368 populations. On the other hand, mutations in *iclR* and *hslU* appear to either require the presence  
369 of mutations in other genes to become highly beneficial or may not be able to experience any  
370 mutations that are beneficial enough to make them competitive early on in the LTEE. Of the 12  
371 LTEE populations, 11 have cells mutations in *iclR* and 11 have mutations in *hslU* by 20,000  
372 generations, which makes them more common than mutations in *spoT* and *ybaL* in the long run.

373 The nature of epistasis and the limits that it imposes on predicting the future evolution of a  
374 cell population could be further probed using our approach in several ways. One could repeat the  
375 evolution experiment beginning with genotypes containing different first-step beneficial  
376 mutations as starting points to more finely map the fitness landscape. One could also interrogate  
377 the diverse collections of cells containing different beneficial alleles that we have evolved, by  
378 taking the 150-generation populations and further evolving them under different conditions to  
379 map genotype by environment effects, for example. Such experiments might also reveal latent  
380 beneficial mutation in other genes (e.g., *iclR* and *hslU*) that were able to outcompete the ancestor  
381 in our experiment but remained below the detection limit because they were not as beneficial as  
382 mutations in *topA*, *pykF*, and *nadR* in this environment. There is precedent for changes in the  
383 environment deflecting selection to different subsets of the same genes. In an offshoot of the  
384 LTEE that began with a clone that had *spoT*, *topA*, and *pykF* mutations, selection was focused on  
385 *hslU*, *iclR*, or *nadR* depending on changes in temperature [54].

386 Alternative and complementary methods exist for deeply profiling the evolutionary  
387 possibilities inherent in the fitness landscape of a cell, i.e., its evolvome. We tracked spontaneous  
388 beneficial mutations within targeted genome regions, or a portion of what one could more  
389 specifically describe as the adaptome [63]. Amplicon sequencing can also capture mutations in a  
390 subset of the genome with deep coverage. We used hybridization-based enrichment, which did  
391 not require any experimental optimization for different targets and is less likely to introduce  
392 biases in inferring the frequencies of mutations, like IS insertions, that change amplicon sizes  
393 [64]. With enough input DNA and enough sequencing, our approach could be scaled to more  
394 genes or the whole genome. Tracking the frequencies of barcoded cells and their progeny has  
395 been used to characterize the statistical properties of much larger collections of naturally

396 occurring beneficial mutations and when they are much rarer within populations [27,28].  
397 However, one must barcode individuals in the population to apply this method, which may be  
398 difficult in certain cell types or in clinical samples, and additional genome sequencing after an  
399 experiment is completed is required to discover the identities of the beneficial mutations linked  
400 to barcodes. Other methods such as deep-mutational scanning [65] or CRISPR-enabled trackable  
401 genome engineering [66] can simultaneously interrogate large libraries of mutants to map  
402 evolvomes. However, since they artificially construct variant libraries, they do not necessarily  
403 provide information about which genetic variants are accessible by spontaneous mutations and  
404 would therefore be expected to contribute the most to a cell's adaptome.

405 Exhaustively mapping paths that clonal evolution is likely to follow is of particular interest  
406 and utility in systems that evolve repeatedly from a defined starting point. These range from  
407 bioreactors that are seeded with the same strain in different production runs to lung infections in  
408 cystic fibrosis patients that start from similar, but not identical, opportunistic pathogens. The  
409 ability to identify mutations in key genes while they are still very rare may also be used to  
410 improve the early detection and predicting drug resistance in other human infections and cancer.  
411 The evolutionary dynamics will be more complex in many of these systems, but they may also  
412 unfold more slowly. For example, biofilm formation and the necessity of invading already  
413 colonized niches will slow the dynamics of competition. This potentially makes the therapeutic  
414 window for detecting incipient evolution by profiling the adaptome even greater.

415

## 416 **Materials and Methods**

### 417 **Evolution experiment**

418 Strains and growth conditions are derived from the Lenski long-term evolution experiment  
419 [29,67]. Nine clonal isolates of *E. coli* B strain REL606 and nine of strain REL607 were grown  
420 overnight at 37°C with orbital shaking over a one-inch diameter at 120 RPM in 10 mL of Davis  
421 Minimal (DM) media containing 100 µg/L glucose (DM100). This is a slightly higher  
422 concentration of glucose than the 25 µg/L glucose (DM25) used in the LTEE. Day 0 cultures  
423 containing 10 mL of fresh DM100 were inoculated with 50 µL of one REL606 culture and 50 µL  
424 of one REL607 culture for overnight growth in the same conditions. The remaining culture  
425 volume was archived at -80°C with 2 mL dimethyl sulfoxide (DMSO) added as cryoprotectant.  
426 Daily transfer of 100 µL of overnight culture to 10 mL of fresh DM100 and archival of the  
427 remaining culture volume in the same way continued through 75 daily transfers. Periodically 1  
428 µL of culture was diluted 10,000-fold in sterile saline and plated on tetrazolium arabinose (TA)  
429 agar to allow growth of ~200 colonies. REL606 and REL607 differ by a mutation in an  
430 arabinose utilization gene that makes REL606 (Ara<sup>-</sup>) colonies red and REL607 (Ara<sup>+</sup>) colonies  
431 pink [29]. The ratio of red to pink colonies was used to monitor these populations for selective  
432 sweeps [62,68].

433

#### 434 **DNA isolation and library preparation**

435 Genomic DNA (gDNA) was isolated from frozen population samples by first thawing each 15  
436 mL conical tube on ice. Of the ~12 mL total volume of culture plus cryoprotectant, 1.2 mL was  
437 transferred to a 2 mL cryovial and refrozen. The remaining ~10.8 mL was centrifuged at 6,500 ×  
438 g at 4°C for 15 minutes. The resulting cell pellets were transferred with a volume of remaining  
439 solution to 1.7 mL Eppendorf tubes. Then, gDNA was isolated using the PureLink Genomic

440 DNA Mini kit (Life Technologies). For each sample, 1  $\mu$ g of gDNA was randomly fragmented  
441 on a Covaris S2 focused-ultrasonicator.

442 Illumina libraries were constructed using the Kappa Biosystems LTP Library Preparation Kit  
443 with the following modifications. End-repaired, fragmented DNA was T-tailed (rather than A-  
444 tailed) in a 50  $\mu$ l reaction including 10 mM dTTP and 5 units of Klenow fragment,  $exo^-$  (New  
445 England Biolabs). Illumina adapters containing 12-base molecular indexes were ligated to the T-  
446 tailed fragments as previously described [32], except full-length adapter sequences containing  
447 unique external sample barcodes were directly ligated to the T-tailed dsDNA inserts to reduce  
448 the risk of cross-contamination between samples. The full list of DNA sequence adaptors used is  
449 provided in **Table S1**.

450

#### 451 **Probe design and target capture**

452 Oligonucleotide probes consisting of 60-base xGen Lockdown probes (Integrated DNA  
453 Technologies) were designed to tile across each of the eight genes of interest including upstream  
454 promoter elements. Probes for each gene were compared to the entire *E. coli* B strain REL606  
455 reference genome (GenBank: NC\_012967.1) [69] using BLASTN [70]. The starting positions of  
456 all probes in a set were shifted by one base at a time until every probe had only a single  
457 significant predicted binding location (match with E-value  $< 2 \times 10^{-5}$ ). The sequences of the final  
458 set of 242 probes are provided in **Table S2**.

459 Capture was performed using a SeqCap EZ Exome Enrichment kit v3.0 (NimbleGen) with  
460 several modifications to the protocol. First, 18 to 20 population samples with unique barcodes  
461 were pooled together in a single capture reaction that contained a total of 1  $\mu$ g of library DNA  
462 from all samples, 1 mmol of a universal blocking oligo, and 1 mmol of a degenerate barcode



463 blocking oligo. The sequences of these blocking oligos are provided in **Table S3**. Second, after  
464 hybridization for 72 h, DNA fragments hybridized to the biotinylated probes were recovered  
465 using MyOne Streptavidin C1 Dynabeads (Life Technologies). Third, a final 8-cycle PCR step  
466 was performed with HiFi Hotstart DNA Polymerase (Kappa Biosystems).

467

### 468 **Sequencing and read processing**

469 Paired-end 101- or 125-base sequencing of the final libraries was performed on an Illumina  
470 HiSeq 2000 at the University of Texas at Austin the Genome Sequencing and Analysis Facility  
471 (GSAF). Read sequences have been deposited into the NCBI Sequence Read Archive  
472 (PRJNA601748). Raw reads were used to generate Consensus Sequence Reads (CSR) using  
473 custom Python scripts that carried out the following steps. First, the beginning of each read was  
474 evaluated for the presence of the expected 5'-end tag, consisting of the random twelve-base  
475 molecular index (MI) followed by four fixed bases (5'-N<sub>12</sub>CAGT). Read pairs lacking the correct  
476 5'-end tag on either read were discarded. For remaining read pairs, the MIs from each read were  
477 concatenated to create a 24-base dual-MI that uniquely identifies the original DNA fragment that  
478 was amplified and sequenced. To group all reads corresponding to the same initial DNA  
479 molecule, a FASTA file of all dual-MIs was used as input into the *ustacks* program from the  
480 Stacks software pipeline (Version 1.48) [71] with the following options: a single read was  
481 sufficient to seed a stack, a single mismatch within the 24 base MI was allowed in assigning a  
482 read to a stack, secondary reads and haplotypes were disabled, and stacks with high coverage  
483 were preserved. Then, CSRs were generated for all MI groups sequenced at least twice by taking  
484 the straight consensus of all reads that were merged into that stack. If no base exceeded 50%  
485 frequency at a given position in this set of reads, then that base was set as unknown (N).

486

## 487 **Variant calling**

488 We used the *breseq* pipeline [52,72,73] (version 0.26.0) to call single-nucleotide variants (SNVs)  
489 and structural variants (SVs) from the CSRs. We divided the genome sequence of the ancestral  
490 *E. coli* REL606 strain into two types of reference regions for mapping in this analysis. The eight  
491 regions of the genome tiled with probes—extended with hundreds of bases of flanking sequence  
492 on both sides—were input as "targeted" sequences, and the remainder of the genome with the  
493 identical eight regions masked to degenerate N bases was supplied as a "junction-only" reference  
494 (to which reads are mapped without variant calling). All 116 samples were analyzed using  
495 *breseq* in polymorphism prediction mode with all bias, minimum allele frequency, and read-  
496 count filters disabled. Evidence items in the Genome Diff (GD) files for all samples were  
497 combined using the *gdtools* utility program to generate a single merged GD file with each piece  
498 of evidence listed a single time, regardless of how many times it was detected in different  
499 samples. We then re-ran *breseq* using the same parameters except that this GD file was supplied  
500 as an input user-evidence file to force output of variant and reference information for these  
501 putative variants in every sample. Then, we extracted the number of variant reads supporting  
502 each putative variant allele and the total number of reads at that reference location from the GD  
503 file output by *breseq* and performed subsequent statistical tests and fitting steps in R (version  
504 3.2.2) [74]. Scripts and data files for this analysis are available in GitHub  
505 (<https://github.com/barricklab/adaptome-capture>).

506 Since this original analysis was conducted at the level of *breseq* evidence (i.e., single  
507 columns of read pileups on the reference genome or instances of new sequence junctions), we  
508 next merged sets of observations that were consistent with a single mutational event when they

509 also had frequency trajectories that tracked together. To identify these candidates for merging,  
510 we analyzed each of the six window (generation 133 to 213) and four complete (generation 0 to  
511 500) time courses separately. We only considered mutations that exceeded a threshold frequency  
512 of 0.03% at some time during each time course as candidates for merging. Read alignment (RA)  
513 evidence items were merged when they were located within 6 base pairs of one another and  
514 within a normalized Canberra distance of 0.1 between the vectors of their frequency observations  
515 across all of the time points in a dataset. All RA evidence pairs of this kind were found to co-  
516 occur in the same sequencing reads. For these cases, the read counts for the first linked mutation  
517 were used to represent the entire event. For example, if a deletion of three base pairs was  
518 predicted by missing bases at positions x, y, and z; then the frequency of missing the first base  
519 (x) was assigned to the entire three-base deletion mutation. For new junction (JC) evidence we  
520 performed the same merging procedure but allowed linked mutations to be within a larger  
521 window of 20 base pairs and within a normalized Canberra distance of 0.5. JC pairs passing  
522 these criteria were only merged if they were also consistent with an IS-element insertion in terms  
523 of their relative orientation and spacing. In this case the variant and total read counts were added  
524 together for the two different junctions, as the junctions on each side of the inserted IS element  
525 provide independent information for estimating the frequency of this type of mutation.

526

### 527 **Time course filtering and selection coefficient estimation**

528 After merging evidence of genetic variants into lists of putative mutations, we further eliminated  
529 putative evolved alleles from consideration using several filtering steps. For the complete time  
530 courses, we first required that non-zero frequencies be observed for a mutation in samples from  
531 at least two different time points. We next applied a filter to eliminate spurious variants that can

532 be recognized as arising from systematic sequencing or alignment errors because they do not  
533 exhibit the correlated changes in frequency over time expected for the frequency trajectories of  
534 real mutations [1]. Specifically, we required that the time-series of estimated frequencies for a  
535 mutation over all analyzed time points have an autocorrelation value  $\geq 0.55$ .

536 For the window time courses, we further required that the estimated frequency of a putative  
537 mutation be  $\geq 10^{-4}$  at each of the last three time points that were sequenced (generations 193,  
538 206, and 213). Then, we fit a binomial logistic model with slope and  $x$ -intercept terms to the time  
539 courses of counts of variant and reference (total minus variant) observations for each mutation.  
540 We filtered out any mutations for which this fit had an AIC  $< 200$ , Bonferroni-corrected  $p$ -value  
541 for the slope differing from zero of  $> 0.05$ , or an  $x$ -intercept  $< -15$ . The slope fit from the  
542 frequency trajectory of each mutation is an estimate of the selection coefficient of each mutation,  
543 assuming the trajectories reflect competition purely against the ancestral strain. However, in the  
544 latter half of the window time courses we detected a significant deviation from linearity for all  
545 mutation trajectories, indicating that the overall population fitness had increased to a degree that  
546 it decreased the rate at which all newly evolved genotypes with beneficial mutations increased in  
547 frequency. The figures show the best models for a stepwise increase in population fitness  
548 between the sequenced time points that improved the fits for all mutations in each population  
549 considered separately. Because there was significant uncertainty in these estimates and the  
550 fitness trajectories are expected to be highly similar between different populations, we used a  
551 consensus model with one step-wise increase in fitness over time that best improved the fits for  
552 all mutations from all populations to correct the estimated selection coefficients for this effect.

553

554 **Mutation statistics and plots**

555 One *nadR* mutation from population A2 was a noticeable outlier in terms of its large apparent  
556 fitness benefit of 9.2%. Given that the next-highest observed selection coefficient for a mutation  
557 was 8.0%, it is likely that the lineage with this *nadR* mutation also sustained a secondary  
558 beneficial mutation early enough that they rose to detectable frequencies together. Therefore, we  
559 removed this mutation before analyzing or graphing the characteristics of the set of likely single-  
560 step mutations. Graphs were generated in R using the ggplot2 package [75].

561

## 562 **Protein structure analysis**

563 Structural domains in NadR, PykF, and TopA were defined according to UniProt and papers  
564 reporting x-ray crystal structures. Mutations in PykF were mapped onto Protein Data Bank  
565 structure 4YNG [41]. Mutations in TopA were mapped onto Protein Data Bank structure 1MW8  
566 [47]. Protein structures were visualized using Pymol v2.3.5 (Schrödinger LLC).

567

## 568 **Acknowledgements**

569 The authors acknowledge the Texas Advanced Computing Center (TACC) at The University of  
570 Texas at Austin for providing high-performance computing resources.

571

## 572 **Supporting Information**

573 **Table S1** Adapter sequences used in DNA library preparation

574 **Table S2** Sequences of pulldown probes

575 **Table S3** Blocking oligos used to limit read-to-read binding during pulldown

576

## 577 **Author contributions**

578 Conceptualization: DED JEB.

579 Data Curation: DED JEB.

580 Funding Acquisition: DED JEB.

581 Investigation: DED.

582 Methodology: DED JEB.

583 Software – DED JEB.

584 Supervision – JEB.

585 Visualization: DED JEB.

586 Writing – Original Draft Preparation: DED JEB.

587 Writing – Review & Editing: DED JEB.

588

## 589 **References**

590

- 591 1. Lang GI, Rice DP, Hickman MJ, Sodergren E, Weinstock GM, Botstein D, et al.  
592 Pervasive genetic hitchhiking and clonal interference in forty evolving yeast populations.  
593 Nature. 2013;500: 571–574. doi:10.1038/nature12344
- 594 2. Maddamsetti R, Lenski RE, Barrick JE. Adaptation, clonal interference, and frequency-  
595 dependent interactions in a long-term evolution experiment with *Escherichia coli*.  
596 Genetics. 2015;200: 619–631. doi:10.1534/genetics.115.176677
- 597 3. Good BH, McDonald MJ, Barrick JE, Lenski RE, Desai MM. The dynamics of molecular  
598 evolution over 60,000 generations. Nature. 2017;551: 45–50. doi:10.1038/nature24287
- 599 4. Gerrish PJ, Lenski RE. The fate of competing beneficial mutations in an asexual  
600 population. Genetica. 1998;102–103: 127–144.
- 601 5. Park S-C, Krug J. Clonal interference in large populations. Proc Natl Acad Sci U S A.  
602 2007;104: 18135–18140.
- 603 6. Desai MM, Walczak AM, Fisher DS. Genetic diversity and the structure of genealogies in  
604 rapidly adapting populations. Genetics. 2012;193: 565–585.  
605 doi:10.1534/genetics.112.147157
- 606 7. Merlo LMF, Pepper JW, Reid BJ, Maley CC. Cancer as an evolutionary and ecological  
607 process. Nat Rev Cancer. 2006;6: 924–935. doi:10.1038/nrc2013
- 608 8. Thomas RK, Nickerson E, Simons JF, Jänne PA, Tengs T, Yuza Y, et al. Sensitive  
609 mutation detection in heterogeneous cancer specimens by massively parallel picoliter

- 610 reactor sequencing. *Nat Med.* 2006;12: 852–855. doi:10.1038/nm1437
- 611 9. Marusyk A, Almendro V, Polyak K. Intra-tumour heterogeneity: A looking glass for  
612 cancer? *Nat Rev Cancer.* 2012;12: 323–334. doi:10.1038/nrc3261
- 613 10. Merlo LMF, Shah NA, Li X, Blount PL, Vaughan TL, Reid BJ, et al. A comprehensive  
614 survey of clonal diversity measures in Barrett’s esophagus as biomarkers of progression to  
615 esophageal adenocarcinoma. *Cancer Prev Res (Phila).* 2010;3: 1388–1397.  
616 doi:10.1158/1940-6207.CAPR-10-0108
- 617 11. Landau DA, Carter SL, Stojanov P, McKenna A, Stevenson K, Lawrence MS, et al.  
618 Evolution and impact of subclonal mutations in chronic lymphocytic leukemia. *Cell.*  
619 2013;152: 714–26. doi:10.1016/j.cell.2013.01.019
- 620 12. Ding L, Ley TJ, Larson DE, Miller C a., Koboldt DC, Welch JS, et al. Clonal evolution in  
621 relapsed acute myeloid leukaemia revealed by whole-genome sequencing. *Nature.*  
622 2012;481: 506–10. doi:10.1038/nature10738
- 623 13. Marvig RL, Sommer LM, Molin S, Johansen HK. Convergent evolution and adaptation of  
624 *Pseudomonas aeruginosa* within patients with cystic fibrosis. *Nat Genet.* 2015;47: 57–64.  
625 doi:10.1038/ng.3148
- 626 14. Winstanley C, O’Brien S, Brockhurst MA. *Pseudomonas aeruginosa* evolutionary  
627 adaptation and diversification in cystic fibrosis chronic lung infections. *Trends Microbiol.*  
628 2016;24: 327–337. doi:10.1016/j.tim.2016.01.008
- 629 15. Stefani S, Campana S, Cariani L, Carnovale V, Colombo C, Lleo MM, et al. Relevance of  
630 multidrug-resistant *Pseudomonas aeruginosa* infections in cystic fibrosis. *Int J Med*  
631 *Microbiol.* 2017;307: 353–362. doi:10.1016/j.ijmm.2017.07.004
- 632 16. Renda BA, Hammerling MJ, Barrick JE. Engineering reduced evolutionary potential for  
633 synthetic biology. *Mol Biosyst.* 2014;10: 1668–1678. doi:10.1039/c3mb70606k
- 634 17. Rugbjerg P, Sommer MOA. Overcoming genetic heterogeneity in industrial  
635 fermentations. *Nat Biotechnol.* 2019;37: 869–876. doi:10.1038/s41587-019-0171-6
- 636 18. Lee SY, Kim HU. Systems strategies for developing industrial microbial strains. *Nat*  
637 *Biotechnol.* 2015;33: 1061–72. doi:10.1038/nbt.3365
- 638 19. Nielsen J, Keasling JD. Engineering cellular metabolism. *Cell.* 2016;164: 1185–1197.  
639 doi:10.1016/j.cell.2016.02.004
- 640 20. Sandoval CM, Ayson M, Moss N, Lieu B, Jackson P, Gaucher SP, et al. Use of  
641 pantothenate as a metabolic switch increases the genetic stability of farnesene producing  
642 *Saccharomyces cerevisiae*. *Metab Eng.* 2014;25: 215–226.  
643 doi:10.1016/j.ymben.2014.07.006
- 644 21. Rugbjerg P, Myling-Petersen N, Porse A, Sarup-Lytzen K, Sommer MOA. Diverse  
645 genetic error modes constrain large-scale bio-based production. *Nat Commun.* 2018;9:  
646 787. doi:10.1038/s41467-018-03232-w
- 647 22. Zelder O, Hauer B. Environmentally directed mutations and their impact on industrial  
648 biotransformation and fermentation processes. *Curr Opin Microbiol.* 2000;3: 248–251.



- 649 doi:10.1016/S1369-5274(00)00084-9
- 650 23. Barrick JE, Lenski RE. Genome dynamics during experimental evolution. *Nat Rev Genet.*  
651 2013;14: 827–839. doi:10.1038/nrg3564
- 652 24. Gresham D, Dunham MJ. The enduring utility of continuous culturing in experimental  
653 evolution. *Genomics.* 2014;104: 399–405. doi:10.1016/j.ygeno.2014.09.015
- 654 25. Barrick JE, Lenski RE. Genome-wide mutational diversity in an evolving population of  
655 *Escherichia coli*. *Cold Spring Harb Symp Quant Biol.* 2009;74: 119–129.
- 656 26. Traverse CC, Mayo-Smith LM, Poltak SR, Cooper VS. Tangled bank of experimentally  
657 evolved *Burkholderia* biofilms reflects selection during chronic infections. *Proc Natl Acad*  
658 *Sci U S A.* 2013;110: E250–E259. doi:10.1073/pnas.1207025110
- 659 27. Levy SF, Blundell JR, Venkataram S, Petrov DA, Fisher DS, Sherlock G. Quantitative  
660 evolutionary dynamics using high-resolution lineage tracking. *Nature.* 2015;519: 181–  
661 186. doi:10.1038/nature14279
- 662 28. Venkataram S, Dunn B, Li Y, Agarwala A, Chang J, Ebel ER, et al. Development of a  
663 comprehensive genotype-to-fitness map of adaptation-driving mutations in yeast. *Cell.*  
664 2016;166: 1585–1596.E22. doi:10.1016/j.cell.2016.08.002
- 665 29. Lenski RE, Rose MR, Simpson SC, Tadler SC. Long-term experimental evolution in  
666 *Escherichia coli*. I. Adaptation and divergence during 2,000 generations. *Am Nat.*  
667 1991;138: 1315–1341.
- 668 30. Hegreness M, Shores N, Hartl D, Kishony R. An equivalence principle for the  
669 incorporation of favorable mutations in asexual populations. *Science.* 2006;311: 1615–  
670 1617.
- 671 31. Tenaillon O, Barrick JE, Ribeck N, Deatherage DE, Blanchard JL, Dasgupta A, et al.  
672 Tempo and mode of genome evolution in a 50,000-generation experiment. *Nature.*  
673 2016;536: 165–170. doi:10.1038/nature18959
- 674 32. Schmitt MW, Kennedy SR, Salk JJ, Fox EJ, Hiatt JB, Loeb LA. Detection of ultra-rare  
675 mutations by next-generation sequencing. *Proc Natl Acad Sci U S A.* 2012;109: 14508–  
676 14513. doi:10.1073/pnas.1208715109
- 677 33. Bainbridge MN, Wang M, Burgess DL, Kovar C, Rodesch MJ, D’Ascenzo M, et al.  
678 Whole exome capture in solution with 3 Gbp of data. *Genome Biol.* 2010;11: R62.  
679 doi:10.1186/gb-2010-11-6-r62
- 680 34. Raffaelli N, Lorenzi T, Mariani PL, Emanuelli M, Amici A, Ruggieri S, et al. The  
681 *Escherichia coli* NadR regulator is endowed with nicotinamide mononucleotide  
682 adenylyltransferase activity. *J Bacteriol.* 1999;181: 5509–5511.
- 683 35. Kurnasov O V., Polanuyer BM, Ananta S, Sloutsky R, Tam A, Gerdes SY, et al.  
684 Ribosylnicotinamide Kinase Domain of NadR Protein: Identification and Implications in  
685 NAD Biosynthesis. *J Bacteriol.* 2003;185: 698–698. doi:10.1128/JB.185.2.698.2003
- 686 36. Barrick JE, Yu DS, Yoon SH, Jeong H, Oh TK, Schneider D, et al. Genome evolution and  
687 adaptation in a long-term experiment with *Escherichia coli*. *Nature.* 2009;461: 1243–



- 688 1247.
- 689 37. Siddiquee KAZ, Arauzo-Bravo MJ, Shimizu K. Effect of a pyruvate kinase (*pykF*-gene)  
690 knockout mutation on the control of gene expression and metabolic fluxes in *Escherichia*  
691 *coli*. FEMS Microbiol Lett. 2004;235: 25–33. doi:10.1016/j.femsle.2004.04.004
- 692 38. Kochanowski K, Volkmer B, Gerosa L, Van Rijsewijk BRH, Schmidt A, Heinemann M.  
693 Functioning of a metabolic flux sensor in *Escherichia coli*. Proc Natl Acad Sci U S A.  
694 2013;110: 1130–1135. doi:10.1073/pnas.1202582110
- 695 39. Peng F, Widmann S, Wünsche A, Duan K, Donovan KA, Dobson RCJ, et al. Effects of  
696 beneficial mutations in *pykF* gene vary over time and across replicate populations in a  
697 long-term experiment with bacteria. Mol Biol Evol. 2018;35: 202–210.  
698 doi:10.1093/molbev/msx279
- 699 40. Mattevi A, Valentini G, Rizzi M, Speranza ML, Bolognesi M, Coda A. Crystal structure  
700 of *Escherichia coli* pyruvate kinase type I: molecular basis of the allosteric transition.  
701 Structure. 1995;3: 729–741. doi:10.1016/S0969-2126(01)00207-6
- 702 41. Donovan KA, Atkinson SC, Kessans SA, Peng F, Cooper TF, Griffin MDW, et al.  
703 Grappling with anisotropic data, pseudo-merohedral twinning and pseudo-translational  
704 noncrystallographic symmetry: A case study involving pyruvate kinase. Acta Crystallogr  
705 Sect D Struct Biol. 2016;72: 512–519. doi:10.1107/S205979831600142X
- 706 42. Woods R, Schneider D, Winkworth CL, Riley MA, Lenski RE. Tests of parallel molecular  
707 evolution in a long-term experiment with *Escherichia coli*. Proc Natl Acad Sci U S A.  
708 2006;103: 9107–9712. doi:10.1073/pnas.0602917103
- 709 43. Massé E, Drolet M. Relaxation of transcription-induced negative supercoiling is an  
710 essential function of *Escherichia coli* DNA topoisomerase I. J Biol Chem. 1999;274:  
711 16654–16658. doi:10.1074/jbc.274.23.16654
- 712 44. Dinardo S, Voelkel KA, Sternglanz R, Reynolds AE, Wright A. *Escherichia coli* DNA  
713 topoisomerase I mutants have compensatory mutations in DNA gyrase genes. Cell.  
714 1982;31: 43–51. doi:10.1016/0092-8674(82)90403-2
- 715 45. Pruss GJ, Manes SH, Drlica K. *Escherichia coli* DNA topoisomerase I mutants: Increased  
716 supercoiling is corrected by mutations near gyrase genes. Cell. 1982;31: 35–42.  
717 doi:10.1016/0092-8674(82)90402-0
- 718 46. Tan K, Zhou Q, Cheng B, Zhang Z, Joachimiak A, Tse-Dinh YC. Structural basis for  
719 suppression of hypernegative DNA supercoiling by *E. coli* topoisomerase I. Nucleic Acids  
720 Res. 2015;43: 11031–11046. doi:10.1093/nar/gkv1073
- 721 47. Perry K, Mondragón A. Structure of a complex between *E. coli* DNA topoisomerase I and  
722 single-stranded DNA. Structure. 2003;11: 1349–1358. doi:10.1016/j.str.2003.09.013
- 723 48. Crozat E, Philippe N, Lenski RE, Geiselman J, Schneider D. Long-term experimental  
724 evolution in *Escherichia coli*. XII. DNA topology as a key target of selection. Genetics.  
725 2005;169: 523–532.
- 726 49. Crozat E, Winkworth C, Gaffé J, Hallin PF, Riley MA, Lenski RE, et al. Parallel genetic  
727 and phenotypic evolution of DNA superhelicity in experimental populations of

- 728 *Escherichia coli*. Mol Biol Evol. 2010;27: 2113–2128.
- 729 50. Houdaigui B El, Forquet R, Hindré T, Schneider D, Nasser W, Reverchon S, et al.  
730 Bacterial genome architecture shapes global transcriptional regulation by DNA  
731 supercoiling. Nucleic Acids Res. 2019;47: 5648–5657. doi:10.1093/nar/gkz300
- 732 51. Ostrowski EA, Woods RJ, Lenski RE. The genetic basis of parallel and divergent  
733 phenotypic responses in evolving populations of *Escherichia coli*. Proc R Soc B.  
734 2008;275: 277–284. doi:10.1098/rspb.2007.1244
- 735 52. Deatherage DE, Traverse CC, Wolf LN, Barrick JE. Detecting rare structural variation in  
736 evolving microbial populations from new sequence junctions using *breseq*. Front Genet.  
737 2015;5: 468. doi:10.3389/fgene.2014.00468
- 738 53. Tenaillon O, Rodríguez-Verdugo A, Gaut RL, McDonald P, Bennett AF, Long AD, et al.  
739 The molecular diversity of adaptive convergence. Science. 2012;335: 457–461.  
740 doi:10.1126/science.1212986
- 741 54. Deatherage DE, Kepner JL, Bennett AF, Lenski RE, Barrick JE. Specificity of genome  
742 evolution in experimental populations of *Escherichia coli* evolved at different  
743 temperatures. Proc Natl Acad Sci U S A. 2017;114: E1904–E1912.  
744 doi:10.1073/pnas.1616132114
- 745 55. Frenkel EM, McDonald MJ, Van Dyken JD, Kosheleva K, Lang GI, Desai MM. Crowded  
746 growth leads to the spontaneous evolution of semistable coexistence in laboratory yeast  
747 populations. Proc Natl Acad Sci. 2015;112: 11306–11311. doi:10.1073/pnas.1506184112
- 748 56. Baym M, Lieberman TD, Kelsic ED, Chait R, Gross R, Yelin I, et al. Spatiotemporal  
749 microbial evolution on antibiotic landscapes. Science. 2016;353: 1147–1151.  
750 doi:10.1126/science.aag0822
- 751 57. Khan AI, Dinh DM, Schneider D, Lenski RE, Cooper TF. Negative epistasis between  
752 beneficial mutations in an evolving bacterial population. Science. 2011;332: 1193–1196.
- 753 58. Chou H-H, Chiu H-C, Delaney NF, Segrè D, Marx CJ. Diminishing returns epistasis  
754 among beneficial mutations decelerates adaptation. Science. 2011;332: 1190–1192.
- 755 59. Wisner MJ, Ribeck N, Lenski RE. Long-term dynamics of adaptation in asexual  
756 populations. Science. 2013;342: 1364–1367. doi:10.1126/science.1243357
- 757 60. Kryazhimskiy S, Rice DP, Jerison ER, Desai MM. Global epistasis makes adaptation  
758 predictable despite sequence-level stochasticity. Science. 2014;344: 1519–1522.  
759 doi:10.1126/science.1250939
- 760 61. Wei X, Zhang J. Patterns and mechanisms of diminishing returns from beneficial  
761 mutations. Mol Biol Evol. 2019;36: 1008–1021. doi:10.1093/molbev/msz035
- 762 62. Woods RJ, Barrick JE, Cooper TF, Shrestha U, Kauth MR, Lenski RE. Second-order  
763 selection for evolvability in a large *Escherichia coli* population. Science. 2011;331: 1433–  
764 1436.
- 765 63. Ryall B, Eydallin G, Ferenci T. Culture history and population heterogeneity as  
766 determinants of bacterial adaptation: the adaptomics of a single environmental transition.

- 767 Microbiol Mol Biol Rev. 2012;76: 597–625. doi:10.1128/MMBR.05028-11
- 768 64. Fischer S, Greipel L, Klockgether J, Dorda M, Wiehlmann L, Cramer N, et al. Multilocus  
769 amplicon sequencing of *Pseudomonas aeruginosa* cystic fibrosis airways isolates  
770 collected prior to and after early antipseudomonal chemotherapy. J Cyst Fibros. 2017;16:  
771 346–352. doi:10.1016/j.jcf.2016.10.013
- 772 65. Fowler DM, Fields S. Deep mutational scanning: a new style of protein science. Nat  
773 Methods. 2014;11: 801–807. doi:10.1038/nmeth.3027
- 774 66. Garst AD, Bassalo MC, Pines G, Lynch SA, Halweg-Edwards AL, Liu R, et al. Genome-  
775 wide mapping of mutations at single-nucleotide resolution for protein, metabolic and  
776 genome engineering. Nat Biotechnol. 2017;35: 48–55. doi:10.1038/nbt.3718
- 777 67. Lenski RE, Travisano M. Dynamics of adaptation and diversification: a 10,000-generation  
778 experiment with bacterial populations. Proc Natl Acad Sci U S A. 1994;91: 6808–6814.
- 779 68. Hegreness M, Kishony R. Analysis of genetic systems using experimental evolution and  
780 whole-genome sequencing. Genome Biol. 2007;8: 201.
- 781 69. Jeong H, Barbe V, Lee CH, Vallenet D, Yu DS, Choi S-H, et al. Genome sequences of  
782 *Escherichia coli* B strains REL606 and BL21(DE3). J Mol Biol. 2009;394: 644–652.
- 783 70. Camacho C, Coulouris G, Avagyan V, Ma N, Papadopoulos J, Bealer K, et al. BLAST+:  
784 architecture and applications. BMC Bioinformatics. 2009;10: 421. doi:10.1186/1471-  
785 2105-10-421
- 786 71. Catchen J, Hohenlohe PA, Bassham S, Amores A, Cresko WA. Stacks: an analysis tool  
787 set for population genomics. Mol Ecol. 2013;22: 3124–3140. doi:10.1111/mec.12354
- 788 72. Deatherage DE, Barrick JE. Identification of mutations in laboratory-evolved microbes  
789 from next-generation sequencing data using *breseq*. Sun L, Shou W, editors. Methods Mol  
790 Biol. 2014;1151: 165–188. doi:10.1007/978-1-4939-0554-6\_12
- 791 73. Barrick JE, Colburn G, Deatherage DE, Traverse CC, Strand MD, Borges JJ, et al.  
792 Identifying structural variation in haploid microbial genomes from short-read  
793 resequencing data using *breseq*. BMC Genomics. 2014;15: 1039. doi:10.1186/1471-2164-  
794 15-1039
- 795 74. R Core Team. R: A Language and Environment for Statistical Computing. Vienna,  
796 Austria: R Foundation for Statistical Computing; 2016.
- 797 75. Wickham H. ggplot2: Elegant Graphics for Data Analysis. New York: Springer-Verlag;  
798 2016.
